# Supplementary material
Source: HighWire-hosted journal article supplement (https://bmjopen.bmj.com/content/12/6/e059174)
Supplement: inline-supplementary-material-1 [file inline-supplementary-material-1.pdf]

## Effect of traditional Chinese exercise on abnormal lipid metabolism in patients with atherosclerosis : protocol for systematic review and meta-analysis

### 1. Search Strategy for CINAHL (EBSCO)

- S1 ( MH("random assignment" OR "placebos" OR "placebo effect" OR "single-blind studies" OR "double-blind studies" OR "triple-blind studies" OR "randomized controlled trials" OR "comparative studies" OR "evaluation research" OR "prospective studies" OR "crossover design" OR "prospective Studies" OR "clinical trials" OR "clinical trial registry") ) OR ( TX(random\$ OR allocation OR "random allocation" OR placebo\$ OR single blind OR double blind OR "randomized controlled trial\*" OR "controlled clinical trial\*" OR "comparative study" OR "evaluation stud\*" OR "follow-up stud\*" OR "prospective stud\*" OR "cross-over stud\*" OR control\$ OR prospectiv\$ OR volunteer\$ OR "RCT" OR "clinical trial\*" ) ) OR ( PT( randomized controlled trial OR "clinical trial\*" ) )
- S2 TX("arteriosclerosis" OR "atherosclerosis" OR "peripheral arterial disease")
- S3 AB(tai chi OR taiji OR qigong OR liuzijue OR wuqinxi OR yijinjing OR baduanjin OR traditional exercise OR chinese traditional exercise OR traditional chinese exercise OR chinese exercise)
- S4 S1 AND S2 AND S3

### 2. Search Strategy for Web of Science

- #1 TS=(random OR allocation OR random allocation OR placebo OR single blind OR single blind method OR double blind OR double blind method OR randomized controlled trial OR randomised controlled trial OR RCT OR clinical trial)
- #2 TS=(tai chi OR taiji OR qigong OR liuzijue OR wuqinxi OR yijinjing OR baduanjin OR traditional exercise OR chinese traditional exercise OR traditional chinese exercise OR chinese exercise)
- #3 TS=( arteriosclerosis OR "atherosclerosis" OR " peripheral arterial disease")
- #4 #1 AND #2 AND #3

### 3. search strategy for Embase

- #1 'randomization'/exp OR 'placebo'/exp OR 'placebo effect'/exp OR 'single blind procedure'/exp OR 'double blind procedure'/exp OR 'randomized controlled trial'/exp OR 'randomized controlled trial (topic)'/exp OR 'controlled clinical trial'/exp OR 'controlled clinical trial (topic)'/exp OR 'clinical trial'/exp OR 'clinical trial (topic)'/exp

- #2 random\*:ab,ti OR allocation:ab,ti OR "random allocation":ab,ti OR placebo:ab,ti OR single blind:ab,ti OR double blind:ab,ti OR randomised controlled trial\*:ab,ti OR randomized controlled trial\*:ab,ti OR RCT:ab,ti OR clinical trial\*:ab,ti
- #3 #1 OR #2
- #4 'arteriosclerosis /exp OR 'atherosclerosis /exp OR 'peripheral arterial disease /exp
- #5 tai chi:ab,ti OR taiji\*:ab,ti OR qigong:ab,ti OR liuzijue:ab,ti OR wuqinxi:ab,ti OR yijinjing:ab,ti OR baduanjin:ab,ti OR traditional exercise:ab,ti OR chinese traditional exercise:ab,ti OR traditional chinese exercise:ab,ti OR chinese exercise:ab,ti
- #6 #3 and #4 and #5

#### 4. search strategy for Cochrane Library

- #1 "random\*" or allocation or "random allocation" or placebo or single blind or double blind or "randomized controlled trial\*" or RCT or "clinical trial"
- #2 randomized controlled trial:pt or clinical trial:pt
- #3 arteriosclerosis:ti,ab,kw OR atherosclerosis:ti,ab,kw OR peripheral arterial disease:ti,ab,kw
- #4 tai chi:ti,ab,kw OR taiji\*:ti,ab,kw OR qigong:ti,ab,kw OR liuzijue:ti,ab,kw OR wuqinxi:ti,ab,kw OR yijinjing:ti,ab,kw OR baduanjin:ti,ab,kw OR traditional exercise:ti,ab,kw OR chinese traditional exercise:ti,ab,kw OR traditional chinese exercise:ti,ab,kw OR chinese exercise:ti,ab,kw
- #5 #1 and #2 and #3 and #4

#### 5. Search Strategy for CNKI

- #1 SU=随机 OR SU=随机分配 OR SU=随机对照 OR SU=对照 OR SU=盲法 OR SU=单盲 OR SU=双盲 OR SU=随机对照试验 OR SU=随机对照研究 OR SU=临床试验 OR SU=临床观察 OR SU=临床研究（精确匹配）
- #2 SU=动脉粥样硬化 OR SU=动脉硬化 OR SU=外周动脉疾病（精确匹配）
- #3 SU=太极拳 OR SU=气功 OR SU=六字诀 OR SU=易筋经 OR SU=五禽戏 OR SU=八段锦 OR SU=传统训练 OR SU=中国传统运动训练 OR SU=中国传统训练（精确匹配）
- #4 #1 AND #2 AND #3

#### 6. Search Strategy for PubMed

- #1 "arteriosclerosis"[Mesh]
- #2 (atherosclerosis[Title/Abstract]) OR (peripheral arterial disease[Title/Abstract])
- #3 ("arteriosclerosis"[Mesh]) OR ((atherosclerosis[Title/Abstract]) OR (peripheral arterial disease[Title/Abstract]))
- #4 tai chi[MeSH Terms]
- #5 ((((((taiji[Title/Abstract]) OR (qigong[Title/Abstract]) OR (wuqinxi[Title/Abstract])) OR (baduanjin[Title/Abstract])) OR (traditional exercise[Title/Abstract])) OR (traditional chinese medicine[Title/Abstract])) OR (chinese traditional exercise[Title/Abstract])) OR (chinese

- exercise[Title/Abstract])
- #6 ((tai chi[MeSH Terms]) OR (((((((taiji[Title/Abstract]) OR (qigong[Title/Abstract]) OR (wuqinxi[Title/Abstract]) OR (baduanjin[Title/Abstract])) OR (traditional exercise[Title/Abstract])) OR (traditional chinese medicine[Title/Abstract])) OR (chinese traditional exercise[Title/Abstract])) OR (chinese exercise[Title/Abstract]))
- #7 random[MeSH Terms]
- #8 (((((allocation[Title/Abstract]) OR (random allocation[Title/Abstract])) OR (placebo[Title/Abstract])) OR (single blind[Title/Abstract])) OR (double blind[Title/Abstract])) OR (randomized controlled trial[Title/Abstract])) OR (RCT[Title/Abstract])
- #9 (random[MeSH Terms]) OR (((((((allocation[Title/Abstract]) OR (random allocation[Title/Abstract])) OR (placebo[Title/Abstract])) OR (single blind[Title/Abstract])) OR (double blind[Title/Abstract])) OR (randomized controlled trial[Title/Abstract])) OR (RCT[Title/Abstract]))
- #10 (((("arteriosclerosis"[Mesh]) OR ((atherosclerosis[Title/Abstract]) OR (peripheral arterial disease[Title/Abstract]))) AND ((random[MeSH Terms]) OR (((((((allocation[Title/Abstract]) OR (random allocation[Title/Abstract])) OR (placebo[Title/Abstract])) OR (single blind[Title/Abstract])) OR (double blind[Title/Abstract])) OR (randomized controlled trial[Title/Abstract])) OR (RCT[Title/Abstract])))) AND ((tai chi[MeSH Terms]) OR (((((((taiji[Title/Abstract]) OR (qigong[Title/Abstract]) OR (wuqinxi[Title/Abstract]) OR (baduanjin[Title/Abstract])) OR (traditional exercise[Title/Abstract])) OR (traditional chinese medicine[Title/Abstract])) OR (chinese traditional exercise[Title/Abstract])) OR (chinese exercise[Title/Abstract]))))
